# Supplementary material
Source: PubMed Central journal article supplement (PMC3202340)
Supplement: NIHMS319979-supplement-1.pdf [file NIHMS319979-supplement-1.pdf]

## Supplemental Digital Content

Table 1: Multivariate model of socioeconomic factors associated with delays in ART initiation.

| Characteristic                                    | HR          | 95% CI             | p-value      |
|---------------------------------------------------|-------------|--------------------|--------------|
| Higher cost renters <sup>†</sup> vs. home owners  | 0.52        | (0.26–1.03)        | 0.062        |
| Lower cost renters <sup>‡</sup> vs. home owners   | <b>0.29</b> | <b>(0.13–0.64)</b> | <b>0.002</b> |
| Residence > median distance from treatment center | 0.69        | (0.43–1.12)        | 0.134        |
| Couple's combined income (per 10,000Ksh)          | 0.90        | (0.79–1.02)        | 0.097        |
| Female gender                                     | 1.09        | (0.70–1.67)        | 0.708        |
| 1st eligible CD4 count (per 100 cells/ $\mu$ L)   | <b>0.61</b> | <b>(0.40–0.94)</b> | <b>0.024</b> |

<sup>†</sup> Cost of rent  $\geq$  median

<sup>‡</sup> Cost of rent < median
